# Supplementary material for: Interactions between an anti-sigma protein and two sigma factors that regulate the pyoverdine signaling pathway in Pseudomonas aeruginosa
Source: PubMed Central journal article supplement (PMC4256889; doi:10.1186/s12866-014-0287-2), 2014-11-30
Supplement: 12866_2014_287_MOESM1_ESM.pdf [file 12866_2014_287_MOESM1_ESM.pdf]

**Table S1.** Oligonucleotide primers used in this study

| <b>Name</b>        | <b>Sequence</b>                |
|--------------------|--------------------------------|
| miniPfpvRXbaIfor   | CCCTCTAGATACGCGTCGTGGGCGACATC  |
| fpvRNEcorRIrev     | AAAGAATTCGCTCTTCCAGCCCCTGCGGC  |
| CTAPEcoRIfor       | AAAGAATTCATGGAGAGCAGCAGATGGAA  |
| CTAPBamHIrev       | AAAGGATCCTGGCCCAGCTGGCCTCACTT  |
| fpvIBamHIfor       | GGGATCCATTGGAAAACCATTATCGGGAGC |
| fpvISacIstoprev    | GGAGCTCTCAGTCGGCTTCCCATTTCG    |
| pvdSBamHIfor       | CCACAGCCAGGATCCGATG            |
| pvdSSalIrev        | GGGGTCGACGCGGGCGCTGAGATGG      |
| CfpvIHindIIIrev    | CGGAAGCTTTCAGCGCATGCGCACCCGACA |
| CpvdSHindIIIrev    | CGGAAGCTTTCACTCGGCGGTGACCTTGCG |
| FpvIintfor (C409A) | TTTCCACCATGCTGCGGGAAATATT      |
| FpvIintrev (C409A) | TCCC GCAGCATGGTGGAAAAGC        |
| FpvIintfor (C434G) | CGACAGTGCTTCATCCCGTTGACGA      |
| FpvIintrev (C434G) | TCGTCAACGGGATGAAGCACTGT        |
| PvdSintfor (T177G) | ACTTCGTCGGTCAAGGCACAGCTCA      |
| PvdSintrev (T177G) | TGAGCTGTGCCTTGACCGACG          |
| PvdSintfor (T494A) | ATGATCCGCGACGCCAGGTGCACT       |
| PvdSintrev (T494A) | GGCAGTGACCTGGGCGTC             |
| PvdSintfor (C526T) | AAGGTCACCGCCGAGCGCTAGGG        |
| PvdSintrev (C526T) | CCCTAGCGCTCGGCGGTGA            |

**Table S2.** Spectrum of mutations obtained following mutagenic PCR.

| Clone    | Nucleotide Position | Basepair change |
|----------|---------------------|-----------------|
| Clone 1  | 2722496             | AT→AT           |
|          | 2722624             | delC            |
|          | 2722728             | GC→AT           |
| Mutant 2 | 2722031             | TA→AT           |
|          | 2722368             | GC→AT           |
|          | 2722556             | CG→AT           |
|          | 2722211             | CG→AT           |
|          | 2722544             | GC→TA           |
| Mutant 3 | 2722139             | CG→AT           |
|          | 2722240             | AT→TA           |
|          | 2722624             | CG→AT           |
|          | 2722191             | GC→TA           |
|          | 2722288             | TA→AT           |
|          | 2722646             | TA→AT           |
| Mutant 4 | 2722111             | GC→AT           |
|          | 2722240             | TA→AT           |
|          | 2722455             | AT→TA           |
|          | 2722204             | CG→AT           |
|          | 2722316             | TA→AT           |
|          | 2722528             | CG→AT           |
| Mutant 5 | 2722419             | delT            |
|          | 2722461             | AT→TA           |
| Mutant 6 | 2722054             | AT→TA           |
|          | 2722644             | AT→TA           |
| Mutant 7 | 2722094             | AT→GC           |
|          | 2722284             | AT→GC           |
|          | 2722419             | TA→CG           |
|          | 2722128             | GC→TA           |
|          | 2722346             | AT→TA           |
|          | 2722449             | TA→AT           |
|          | 2722211             | GC→AT           |
|          | 2722377             | AT→TA           |
| Mutant 8 | 2722522             | TA→AT           |
|          | 2722541             | AT→GC           |
| Mutant 9 | 2722353             | TA→AT           |
|          | 2722367             | AT→GC           |
|          | 2722388             | CG→TA           |
|          | 2722455             | AT→GC           |
|          | 2722631             | TA→CG           |
| 2722688  | AT→GC               |                 |

|           |         |       |
|-----------|---------|-------|
| Mutant 10 | 2722486 | GC→AT |
|           | 2722348 | GC→AT |
| Mutant 11 | 2722391 | GC→AT |
| Mutant 12 | 2722373 | CG→TA |
| Mutant 13 | 2722457 | GC→CG |

Mutagenic PCR of the *pvdS* gene was carried out, PCR products cloned into pGEM-TEasy, and the sequences of individual clones (1 to 13) determined as described in the main text. Nucleotide position, position in the *P. aeruginosa* genome where the sequence of the mutated gene differs from the reference sequence (v2.pseudomonas.com); base-pair change, the change from wild-type to mutant sequence; del, base-pair deletion.

**Table S3.** FpvI mutants showing increased activity in the presence of FpvR<sub>1-89</sub>

|       | Nucleotide change | Amino acid change | Region     | Repeated mutation <sup>a</sup> | Activity + FpvR <sub>1-89</sub> (SE) | Activity - FpvR <sub>1-89</sub> (SE) |
|-------|-------------------|-------------------|------------|--------------------------------|--------------------------------------|--------------------------------------|
|       | None              |                   |            |                                | 1330 (126)                           | 5655 (598)                           |
|       | C170T             | A57V              | 2.4        |                                |                                      |                                      |
|       | T328G             | C110G             | 4.1        |                                | 2409 (207)                           | ND <sup>b</sup>                      |
|       | A379G             | I127V             | 4.2        |                                |                                      |                                      |
|       | G455C             | R152P             | after 4.2  | *                              | 2675 (361)                           | 4550 (262)                           |
|       | T396A             | N132K             | 4.2        |                                |                                      |                                      |
|       | T458G             | M153R             | after 4.2  | *                              | 2477 (211)                           | ND                                   |
|       | C110A             | S37Y              | 2.3        | *                              |                                      |                                      |
|       | C231A             | D77E              | before 4.1 |                                | 2396 (236)                           | ND                                   |
|       | A352G             | K118E             | 4.1        |                                |                                      |                                      |
|       | A292G             | N98D              | before 4.1 |                                |                                      |                                      |
|       | G455A             | R152H             | after 4.2  | *                              | 2794 (469)                           | ND                                   |
|       | A416T             | E139V             | 4.2        | *                              | 2017 (128)                           | 3393 (303)                           |
|       | A416G             | E139G             | 4.2        | ✓                              | 2318 (176)                           | ND                                   |
|       | T109C             | S37P              | 2.3        | ✓                              |                                      |                                      |
| FpvI  | C305T             | A102V             | before 4.1 | ✓                              |                                      |                                      |
|       | G358A             | D120N             | 4.2        | ✓                              | 2725 (198)                           | ND                                   |
|       | C409A             | L137M             | 4.2        | ✓                              |                                      |                                      |
|       | A299C             | Q100P             | before 4.1 |                                |                                      |                                      |
|       | G335A             | S112N             | 4.1        |                                | 2531 (243)                           | ND                                   |
|       | C305T             | A102V             | before 4.1 | ✓                              | 2787 (174)                           |                                      |
|       | T266A             | V89E              | before 4.1 |                                |                                      |                                      |
|       | C434G             | A145G             | 4.2        | *                              | 2696 (144)                           | 3793 (276)                           |
|       | T109C             | S37P              | 2.3        | ✓                              |                                      |                                      |
|       | C305T             | A102V             | before 4.1 | ✓                              |                                      |                                      |
| T316A | L106M             | 4.1               |            | 2780 (148)                     | 5052 (596)                           |                                      |
| G358A | D120N             | 4.2               | ✓          |                                |                                      |                                      |
| C409A | L137M             | 4.2               | ✓          |                                |                                      |                                      |
| A416G | E139G             | 4.2               | ✓          |                                |                                      |                                      |
| G433T | A145S             | 4.2               | *          | 2257 (101)                     | ND                                   |                                      |
| A457G | M153V             | after 4.2         | *          |                                |                                      |                                      |
| C409A | L137M             | 4.2               | SDM        | 1274 (105)                     | ND                                   |                                      |
| C434G | A145G             | 4.2               | SDM        | 1890 (135)                     | 4238 (186)                           |                                      |

<sup>a</sup> The same amino acid change was identified in more than one mutant (✓) or the same amino acid residue was changed in more than one mutant (\*) or the mutation was introduced by site directed mutagenesis (SDM).

Mutants are separated by a line and mutants identified in different libraries are separated by a thickened line.

<sup>b</sup> ND = not determined.

**Table S4.** PvdS mutants with increased activity in the presence of FpvR<sub>1-89</sub>

|      | Nucleotide change | Amino acid change | Region    | Repeated mutation <sup>a</sup> | Activity + FpvR <sub>1-89</sub> (SE) | Activity - FpvR <sub>1-89</sub> (SE) |
|------|-------------------|-------------------|-----------|--------------------------------|--------------------------------------|--------------------------------------|
|      | None              |                   |           |                                | 876 (124)                            | 1144 (53)                            |
|      | A193G             | S65G              | 2.3       |                                |                                      |                                      |
|      | T406A             | Y136N             | 4.1       |                                | 1104 (119)                           | ND <sup>b</sup>                      |
|      | C526T             | Q176*(stop)       | after 4.2 |                                |                                      |                                      |
| PvdS | T178G             | F60V              | 2.3       |                                | 7423 (221)                           | 4922 (905)                           |
|      | T494A             | L165Q             | 4.2       | ✓                              |                                      |                                      |
|      | T398G             | F133C             | 4.1       | *                              | 3006 (209)                           | 5440 (496)                           |
|      | T191C             | L64P              | 2.3       |                                |                                      |                                      |
|      | T494A             | L165Q             | 4.2       | ✓                              | 2875 (214)                           | 2228 (175)                           |
|      | T311A             | S104T             | 3.2       |                                |                                      |                                      |
|      | T397G             | F133V             | 4.1       | *                              | 1807 (149)                           | ND                                   |
|      | T178G             | F60V              | 2.3       | SDM                            | 902 (59)                             | ND                                   |
|      | T494A             | L165Q             | 4.2       | SDM                            | 1755 (244)                           | 2972 (73)                            |
|      | C526T             | Q176*(stop)       | after 4.2 | SDM                            | 948 (54)                             | ND                                   |

<sup>a</sup> The same amino acid change was identified in more than one mutant (✓) or the same amino acid residue was changed in more than one mutant (\*) or the mutation was introduced by site directed mutagenesis (SDM). Mutants are separated by a line and mutants identified in different libraries are separated by a thickened line.

<sup>b</sup> ND = not determined.

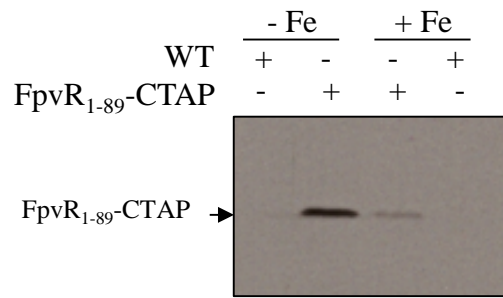

**Figure S1.** Iron regulation of FpvR<sub>1-89</sub>-TAP in *P. aeruginosa*. Samples of *P. aeruginosa* PAO1 (WT) and PAO1 with chromosomally integrated *fpvR*<sub>1-89</sub>-TAP grown in the presence and absence of 300  $\mu$ M FeCl<sub>3</sub> were analysed by Western blotting with anti-CTAP. The position of 30 kDa FpvR<sub>1-89</sub>-CTAP is shown.

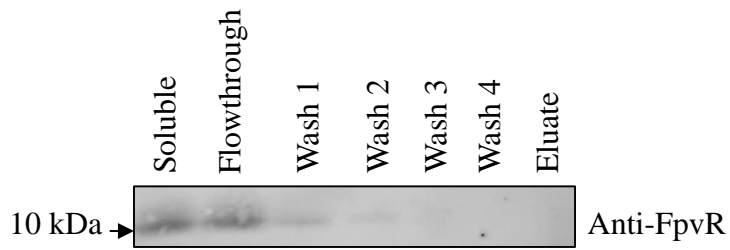

**Figure S2.** Mock purification of untagged FpvR<sub>1-89</sub>. Soluble protein was obtained from *E. coli* MC1061 (DE3) carrying non-histidine tagged FpvR<sub>1-89</sub>. The protein extract was subjected to a mock nickel affinity chromatography purification and analysed by Western blotting with anti-FpvR. The position of the 10 kDa molecular weight marker is shown.

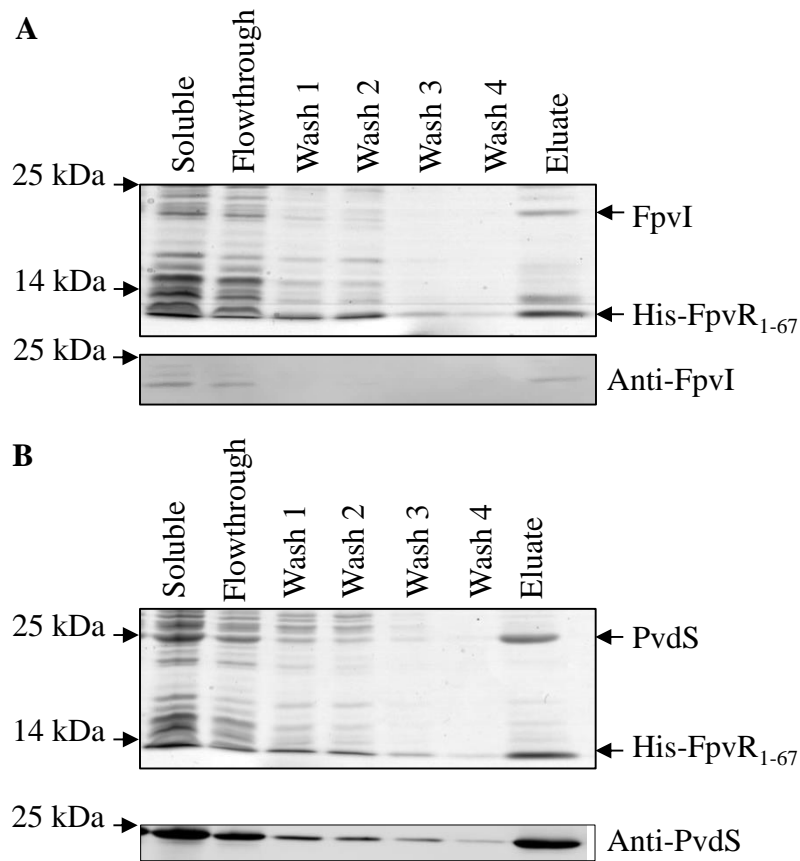

**Figure S3.** Co-purification of His<sub>6</sub>-FpvR<sub>1-67</sub> with FpvI or PvdS from *E. coli*. Soluble protein was obtained from *E. coli* MC1061 (DE3) co-expressing His<sub>6</sub>-FpvR<sub>1-67</sub> and FpvI or His<sub>6</sub>-FpvR<sub>1-67</sub> and PvdS. Protein was purified by nickel affinity chromatography via the His<sub>6</sub>-tag on FpvR<sub>1-67</sub> and analysed by SDS-PAGE and Western blotting with anti-FpvI, anti-PvdS. (A) Co-purification of His<sub>6</sub>-FpvR<sub>1-67</sub> and FpvI; (B) co-purification of His<sub>6</sub>-FpvR<sub>1-67</sub> and PvdS. The positions of the molecular weight markers are shown.
